# Supplementary material for: Fabrication of a Smart Fibrous Biomaterial That Harbors an Active TGF-β1 Peptide: A Promising Approach for Cartilage Regeneration
Source: MDPI journal article supplement (doi:10.3390/biomedicines11071890), 2023-07-03
Supplement: s1 [file s1]

## Figures

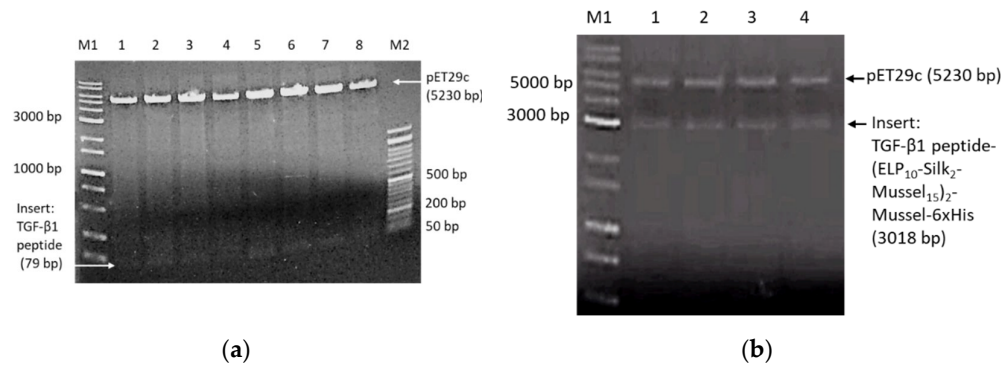

**Figure S1.** Synthesis of the gene "TGF-β1 peptide-(ELP<sub>10</sub>-Silk<sub>2</sub>-Mussel<sub>15</sub>)<sub>2</sub>-Mussel-6xHis". a) Electrophoresis in 1% w/v agarose gel of pET29c and "TGF-β1 peptide" insert after digestion of the recombinant plasmid "pET29c-TGF-β1 peptide" with NdeI and XhoI. Lanes 1-8: plasmids from different colonies that were screened. After DNA sequencing, it was verified that all colonies contained plasmids with the desired insert. b) Assembly of the gene "TGF-β1 peptide-(ELP<sub>10</sub>-Silk<sub>2</sub>-Mussel<sub>15</sub>)<sub>2</sub>-Mussel-6xHis" by PRe-RDL. Lanes 1-4: plasmids from different colonies that were screened by digestion with NdeI and XhoI. M1: 1 kb DNA ladder, M2: 50 bp DNA ladder.

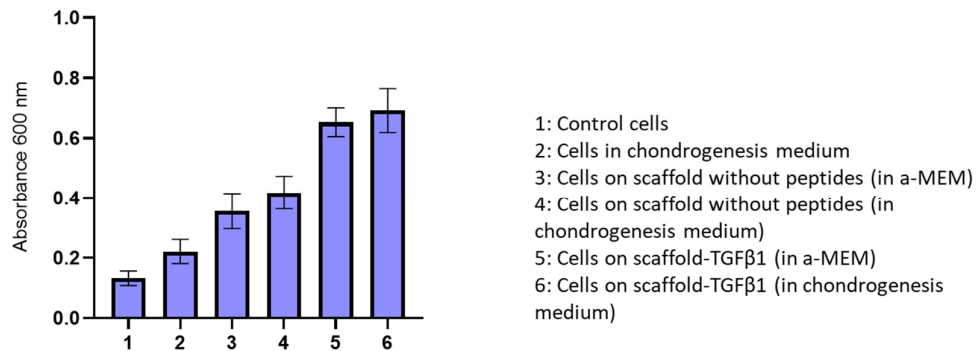

**Figure S2.** Quantification of Alcian Blue staining at 21 days. Optical absorption was measured at 600 nm with a microplate reader (Biotek Plate Reader).

## Tables

**Table S1.** Nucleotide and amino acid sequences of the building blocks.

| Building block            | Nucleotide sequence (5' to 3')                                                                                  | Amino acid sequence        |
|---------------------------|-----------------------------------------------------------------------------------------------------------------|----------------------------|
| ELP                       | GTGCCGGGCGTTGGTGTTCGGGC<br>GTCGGTGTCCCGGTAAAGGCGTT<br>CCGGGTGTGGTGTTCGGGTGTT<br>GGC                             | VPGVGVPGVGVPKGVP<br>VGVPVG |
| Silk                      | GTGGGCGCGGGTGCCGGCAGCGG<br>TGCAGGCGCTGGTTCTGGCGCTGG<br>CGCGGGTTCGGTGCCGGTGCAG<br>GCTCCGGCGCCGGCGCTGGTTCTG<br>GC | V(GAGAGS) <sub>5</sub> G   |
| Mussel                    | GCGAAACCGAGCTATCCGCCGAC<br>CTATAAA                                                                              | AKPSYPPTYK                 |
| Fibronectin (RGD) peptide | TATGCGGTGACCGGTGCTGGTGAT<br>AGCCCGGCCTCTAGCGGC                                                                  | YAVTGRGDSPASSG             |
| Laminin peptide           | TATCATTACGTGACCATTACGCTG<br>GATTACAGCAA                                                                         | YHYVTITLDLQQ               |
| Heparin-binding peptide   | TATCCGACCCAGCGTGC GCGCTAT<br>CAATGGGTGCGTTGCAACCCG                                                              | YPTQRARYQWVRCNP            |
| TGF- $\beta$ 1 peptide    | TATTACGTGGGCCGTAAACCGAA<br>A                                                                                    | YYVGRKPK                   |
| 6xHis tag                 | CATCACCATCACCATCAC                                                                                              | HHHHHH                     |

**Table S2.** Primer sequences for the synthesis of the DNA sequence encoding the “TGF- $\beta$ 1 peptide” by PCR.

| Primer name                    | Sequence (5'-3')                                                          |
|--------------------------------|---------------------------------------------------------------------------|
| TGF- $\beta$ 1 peptide forward | GACTGTCATATGGAAAGCCTGTTGCCGGTGAGGAGCGGT<br>GTGGGCTATTACGTGGGCCGTAAACCGAAA |
| TGF- $\beta$ 1 peptide reverse | AACCACCTCGAGCTGAAGAGCTGTGGTCTGGTGCCTTTCC<br>GTTTACGGCCCACGTAATA           |

**Table S3.** Composition of PCR reaction for the synthesis of the DNA sequence encoding the “TGF- $\beta$ 1 peptide”.

| Reagent                    | Final concentration                  |
|----------------------------|--------------------------------------|
| Forward primer             | 500 nM                               |
| Reverse primer             | 500 nM                               |
| Thermopol Buffer           | 1X (contains 2mM MgSO <sub>4</sub> ) |
| MgSO <sub>4</sub>          | 10 mM                                |
| dNTP mix                   | 3 mM each                            |
| Deep Vent DNA polymerase   | 6 U                                  |
| Sterile ddH <sub>2</sub> O | Up to 50 $\mu$ L                     |

**Table S4.** Conditions of PCR reaction for the synthesis of the DNA sequence encoding the “TGF- $\beta$ 1 peptide”.

| Stage                | Temperature (°C) | Duration (min) | Number of cycles |
|----------------------|------------------|----------------|------------------|
| Initial denaturation | 95               | 3              | 1                |
| Denaturation         | 95               | 1              | 20               |
| Annealing            | 65               | 1              |                  |
|                      | 59               | 1              |                  |
| Extension            | 72               | 1              |                  |
| Final extension      | 72               | 5              | 1                |
| Hold                 | 4                | $\infty$       |                  |

**Table S5.** Primer sequences for real-time PCR.

| Primer                | Nucleotide sequence (5'to3') |
|-----------------------|------------------------------|
| <i>GAPDH</i> forward  | GCACCGTCAAGGCTGAGAAC         |
| <i>GAPDH</i> reverse  | TGGTGAAGACGCCAGTGGA          |
| <i>RPLPO</i> forward  | AATGTGGGCTCCAAGCAGAT         |
| <i>RPLPO</i> reverse  | TGAGGCAGCAGTTTCTCCAG         |
| <i>SOX9</i> forward   | GGCAAGCTCTGGAGACTTCTG        |
| <i>SOX9</i> reverse   | CCCGTTCTTCACCGACTTCC         |
| <i>COL2A1</i> forward | AGAATCCATCTGAGAATATGC        |
| <i>COL2A1</i> reverse | CCTCTTACTGCTATACCTTTAC       |

|                            |                              |
|----------------------------|------------------------------|
| <i>ACAN</i> forward        | GGAAGGGAGGGGAACCATTG         |
| <i>ACAN</i> reverse        | TGATGGCTGTCCACTGACAC         |
| <i>TGFBR1A</i> forward     | AGCAGCAGACAATAAAGACAATGG     |
| <i>TGFBR1A</i> reverse     | TGTGAAGATGGGCAAGACCG         |
| <i>TGFBR2</i> forward      | CTGTAATGCAGTGGGAGAAGTAAAA    |
| <i>TGFBR2</i> reverse      | AATTTCTGGTCGCCCTCGAT         |
| <i>COL1A1</i> forward      | CAGTGTGGCCCAGAAGAACT         |
| <i>COL1A1</i> reverse      | CCGCCATACTCGAACTGGAAT        |
| <i>Osteocalcin</i> forward | CGGTGCAGAGTCCAGCAAA          |
| <i>Osteocalcin</i> reverse | GGTAGCGCCTGGGTCTCTTC         |
| <i>MMP9</i> forward        | TTCCAGTACCGAGAGAAAGCCTAT     |
| <i>MMP9</i> reverse        | GGTCACGTAGCCCACTTGGT         |
| <i>MMP13</i> forward       | AAGGAGCATGGCGACTTCT          |
| <i>MMP13</i> reverse       | TGGCCCAGGAGGAAAAGC           |
| <i>COL10A1</i> forward     | AGAATCCATCTGAGAATATGC        |
| <i>COL10A1</i> reverse     | CCTCTTACTGCTATACCTTTAC       |
| <i>PCNA</i> forward        | TTAAATTGTCACAGACAAGTAATGTCTG |
| <i>PCNA</i> reverse        | TGGCTTTTGTAAGAAGTTCAGGTAC    |
| <i>BAX</i> forward         | GGGCCCACCAGCTCTGA            |
| <i>BAX</i> reverse         | CCTGCTCGATCCTGGATGA          |
| <i>BCL2</i> forward        | CTTGACAGAGGATCATGCTGTAC      |
| <i>BCL2</i> reverse        | GGATGCTTTATTTCATGAGGC        |
| <i>IL1b</i> forward        | ATCACTGAACTGCACGCTCC         |
| <i>IL1b</i> reverse        | TTGTTCTCCATATCCTGTCCC        |
| <i>TNFa</i> forward        | CCTCTCTCAATCAGCCCTCTG        |
| <i>TNFa</i> reverse        | GAGGACCTGGGAGTAGATGAG        |

## Sequences

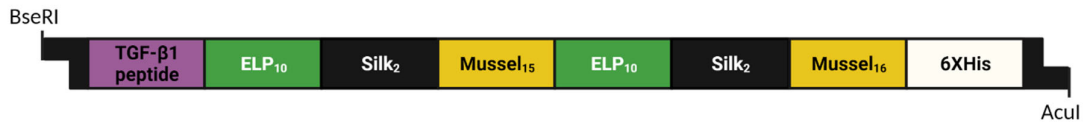

### Nucleotide sequence (2952 bp):

ATGGTTAGCCTGTTGCCGGTGAGGAGCGGTGTGGGCTATTACGTGGGCCGTA  
AACCGAAAGTGCCGGGCGTTGGTGTTCGGGCGTCGGTGTCCCGGGTAAAGG  
CGTTCCGGGTGTTGGTGTTCGGGTGTTGGCGTGCCGGGCGTTGGTGTTCGG  
GCGTCGGTGTCCCGGGTAAAGGCGTTCCGGGTGTTGGTGTTCGGGTGTTGGC  
GTGCCGGGCGTTGGTGTTCGGGCGTCGGTGTCCCGGGTAAAGGCGTTCCGG  
GTGTTGGTGTTCGGGTGTTGGCGTGCCGGGCGTTGGTGTTCGGGCGTCGGT  
GTCCCGGGTAAAGGCGTTCCGGGTGTTGGTGTTCGGGTGTTGGCGTGCCGG  
GCGTTGGTGTTCGGGCGTCGGTGTCCCGGGTAAAGGCGTTCCGGGTGTTGGT  
GTTCGGGTGTTGGCGTGCCGGGCGTTGGTGTTCGGGCGTCGGTGTCCCGGG  
TAAAGGCGTTCCGGGTGTTGGTGTTCGGGTGTTGGCGTGCCGGGCGTTGGTG  
TTCCGGGCGTCGGTGTCCCGGGTAAAGGCGTTCCGGGTGTTGGTGTTCGGGT  
GTTGGCGTGCCGGGCGTTGGTGTTCGGGCGTCGGTGTCCCGGGTAAAGGCG  
TTCCGGGTGTTGGTGTTCGGGTGTTGGCGTGCCGGGCGTTGGTGTTCGGGC  
GTCGGTGTCCCGGGTAAAGGCGTTCCGGGTGTTGGTGTTCGGGTGTTGGCGT  
GCCGGGCGTTGGTGTTCGGGCGTCGGTGTCCCGGGTAAAGGCGTTCCGGGT  
GTTGGTGTTCGGGTGTTGGCGTGGGCGCGGGTGCCGGCAGCGGTGCAGGCG  
CTGGTTCTGGCGCTGGCGCGGGTTCCGGTGCCGGTGCAAGGCTCCGGCGCCGG  
CGCTGGTTCTGGCGTGGGCGCGGGTGCCGGCAGCGGTGCAGGCGCTGGTTCT  
GGCGTGGCGCGGGTTCCGGTGCCGGTGCAAGGCTCCGGCGCCGGCGCTGGTT  
CTGGCGCGAAACCGAGCTATCCGCCGACCTATAAAGCCAAACCGTCTTATCC  
GCCGACGTATAAAGCAAAACCGAGCTATCCGCCGACGTATAAAGCGAAACC

GAGCTATCCGCCGACCTATAAAGCCAAACCGTCTTATCCGCCGACGTATAAA  
GCAAAACCGAGCTATCCGCCGACGTATAAAGCGAAACCGAGCTATCCGCCG  
ACCTATAAAGCCAAACCGTCTTATCCGCCGACGTATAAAGCAAAACCGAGCT  
ATCCGCCGACGTATAAAGCGAAACCGAGCTATCCGCCGACCTATAAAGCCA  
AACCGTCTTATCCGCCGACGTATAAAGCAAAACCGAGCTATCCGCCGACGTA  
TAAAGCGAAACCGAGCTATCCGCCGACCTATAAAGCCAAACCGTCTTATCCG  
CCGACGTATAAAGCAAAACCGAGCTATCCGCCGACGTATAAAGTCCGGGGC  
GTTGGTGTTCGGGGCGTCGGTGTCCCGGGTAAAGGCGTTCCGGGTGTTGGTGT  
TCCGGGTGTTGGCGTGCCGGGGCGTTGGTGTTCGGGGCGTCGGTGTCCCGGGTA  
AAGGCGTTCCGGGTGTTGGTGTTCGGGTGTTGGCGTGCCGGGGCGTTGGTGT  
CCGGGGCGTCGGTGTCCCGGGTAAAGGCGTTCCGGGTGTTGGTGTTCGGGTGT  
TGGCGTGCCGGGGCGTTGGTGTTCGGGGCGTCGGTGTCCCGGGTAAAGGCGTT  
CCGGGTGTTGGTGTTCGGGTGTTGGCGTGCCGGGGCGTTGGTGTTCGGGGCGT  
CGGTGTCCCGGGTAAAGGCGTTCCGGGTGTTGGTGTTCGGGTGTTGGCGTGC  
CGGGCGTTGGTGTTCGGGGCGTCGGTGTCCCGGGTAAAGGCGTTCCGGGTGTT  
GGTGTTCGGGTGTTGGCGTGCCGGGGCGTTGGTGTTCGGGGCGTCGGTGTCCC  
GGGTAAAGGCGTTCCGGGTGTTGGTGTTCGGGTGTTGGCGTGCCGGGGCGTTG  
GTGTTCGGGGCGTCGGTGTCCCGGGTAAAGGCGTTCCGGGTGTTGGTGTTCG  
GGTGTTCGGGTGTTGGTGTTCGGGTGTTGGCGTGCCGGGGCGTTGGTGTTCG  
GGCGTCGGTGTCCCGGGTAAAGGCGTTCCGGGTGTTGGTGTTCGGGTGTTGG  
CGTGGGCGCGGGTGCCGGCAGCGGTGCAGGCGCTGGTTCTGGCGCTGGCGCG  
GGTTCCGGTGCCGGTGCAAGGCTCCGGCGCCGGCGCTGGTTCTGGCGTGCGG  
CGGGTGCCGGCAGCGGTGCAGGCGCTGGTTCTGGCGCTGGCGCGGGTTCCGG  
TGCCGGTGCAAGGCTCCGGCGCCGGCGCTGGTTCTGGCGCGAAACCGAGCTAT  
CCGCCGACCTATAAAGCCAAACCGTCTTATCCGCCGACGTATAAAGCAAAA  
CCGAGCTATCCGCCGACGTATAAAGCGAAACCGAGCTATCCGCCGACCTATA  
AAGCCAAACCGTCTTATCCGCCGACGTATAAAGCAAAACCGAGCTATCCGC  
CGACGTATAAAGCGAAACCGAGCTATCCGCCGACCTATAAAGCCAAACCGT  
CTTATCCGCCGACGTATAAAGCAAAACCGAGCTATCCGCCGACGTATAAAGC  
GAAACCGAGCTATCCGCCGACCTATAAAGCCAAACCGTCTTATCCGCCGACG

TATAAAGCAAACCGAGCTATCCGCCGACGTATAAAGCGAAACCGAGCTAT  
CCGCCGACCTATAAAGCCAAACCGTCTTATCCGCCGACGTATAAAGCAAAA  
CCGAGCTATCCGCCGACGTATAAAGCGAAACCGAGCTATCCGCCGACCTATA  
AAGCGAAACCGAGCTATCCGCCGACCTATAAAGGCAGCGGTTCTGGTGGCTT  
CAGCCATCACCATCACCATCACTAATAA

**Amino acid sequence (982 aa):**

MVSLLPVRSGVGYVGRKPKVPGVGPVGVPKGVPVGVPVGVPVGVPVG  
VGVPKGVPVGVPVGVPVGVPVGVPKGVPVGVPVGVPVGVPVGVPVG  
VPGKVPVGVPVGVPVGVPVGVPKGVPVGVPVGVPVGVPVGVPVGVP  
GKVPVGVPVGVPVGVPVGVPKGVPVGVPVGVPVGVPVGVPVGVPKG  
VPGVGPVGVPVGVPVGVPVGVPKGVPVGVPVGVPVGVPVGVPVGKGV  
PGVGPVGVPVGAGAGSGAGAGSGAGAGSGAGAGSGAGAGSGVAGAGSGAG  
AGSGAGAGSGAGAGSGAGAGSGAKPSYPPTYKAKPSYPPTYKAKPSYPPTYKAKP  
SYPPTYKAKPSYPPTYKAKPSYPPTYKAKPSYPPTYKAKPSYPPTYKAKPSYPPTYKA  
KPSYPPTYKAKPSYPPTYKAKPSYPPTYKAKPSYPPTYKAKPSYPPTYKAKPSYPPTY  
KVPVGVPVGVPKGVPVGVPVGVPVGVPVGVPKGVPVGVPVGVPVGVP  
PGVGPVGVPKGVPVGVPVGVPVGVPVGVPKGVPVGVPVGVPVGVP  
VGVPVGVPKGVPVGVPVGVPVGVPVGVPKGVPVGVPVGVPVGVPVG  
VPGVGPVGKVPVGVPVGVPVGVPVGVPKGVPVGVPVGVPVGVPVGVP  
GVGPVGKVPVGVPVGVPVGVPVGVPKGVPVGVPVGVPVGVPVGAGAGSGA  
GAGSGAGAGSGAGAGSGAGAGSGVAGAGSGAGAGSGAGAGSGAGAGSGAG  
AGSGAKPSYPPTYKAKPSYPPTYKAKPSYPPTYKAKPSYPPTYKAKPSYPPTYKAKP  
SYPPTYKAKPSYPPTYKAKPSYPPTYKAKPSYPPTYKAKPSYPPTYKAKPSYPPTYKA  
KPSYPPTYKAKPSYPPTYKAKPSYPPTYKAKPSYPPTYKAKPSYPPTYKAKPSYPPTY  
KSGSGGFSHHHHHH
